# Supplementary material
Source: Springer Nature journal article supplement (https://www.springermedizin.de/resource/supplementary/12894_2013_307_MOESM1_ESM.pdf/9513662)
Supplement: MOESM1 [file 9513662]

Trials potentially relevant identified and screened (n = 73)

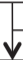

Trials selected and retrieved for full-text analysis (n = 29)

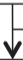

Trials included (n = 13)

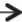

Trials excluded: not randomized, not prostate cancer, not intermittent androgen deprivation (n = 44)

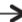

Trials excluded: not randomized, castration-resistant prostate cancer, literature review, guidelines (n = 16, table 1)
